# Supplementary material
Source: PubMed Central journal article supplement (PMC6439633)
Supplement: jamasurg-154-200-s002.pdf [file jamasurg-154-200-s002.pdf]

Mällinen. Risk of appendiceal neoplasm in periappendicular abscess in patients treated with interval appendectomy vs follow-up with magnetic resonance imaging: 1-year outcomes of the Peri-Appendicitis Acuta randomized clinical trial. *JAMA Surgery*. Published online November 29, 2018. doi:10.1001/jamasurg.2018.4373

## **Data Sharing Statement**

### **Data**

**Data available:** No
